# Supplementary material
Source: publisher figshare collection journal article supplement (https://tandf.figshare.com/ndownloader/files/13638683)
Supplement: Supplementary file 1 [file 13638683]

**Supporting Materials**

**
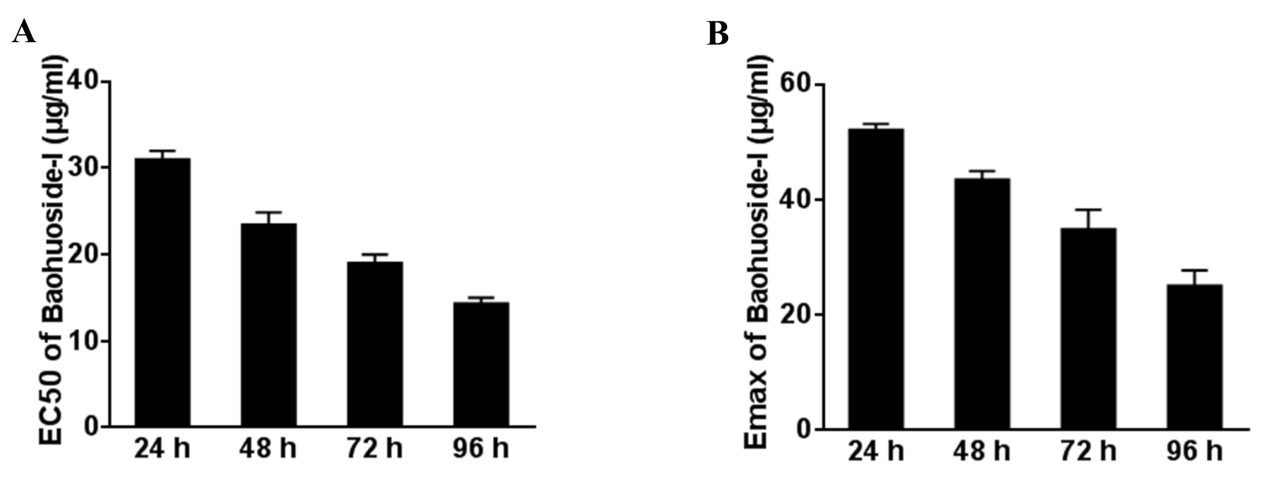
**

**Figure S1. EC50 and Emax of Baohuoside-I with different time of** **continuous incubation in M14 cells.** (A, B) M14 cells were treated with different concentrations of Baohuoside-I or DMSO for 24h, 48h, 72h and 96h, and the cell abilities were analyzed by MTT assay. The EC50 and Emax were analyzed and were presented as mean+SD from three independent experiments with triple replicates per experiment.

**
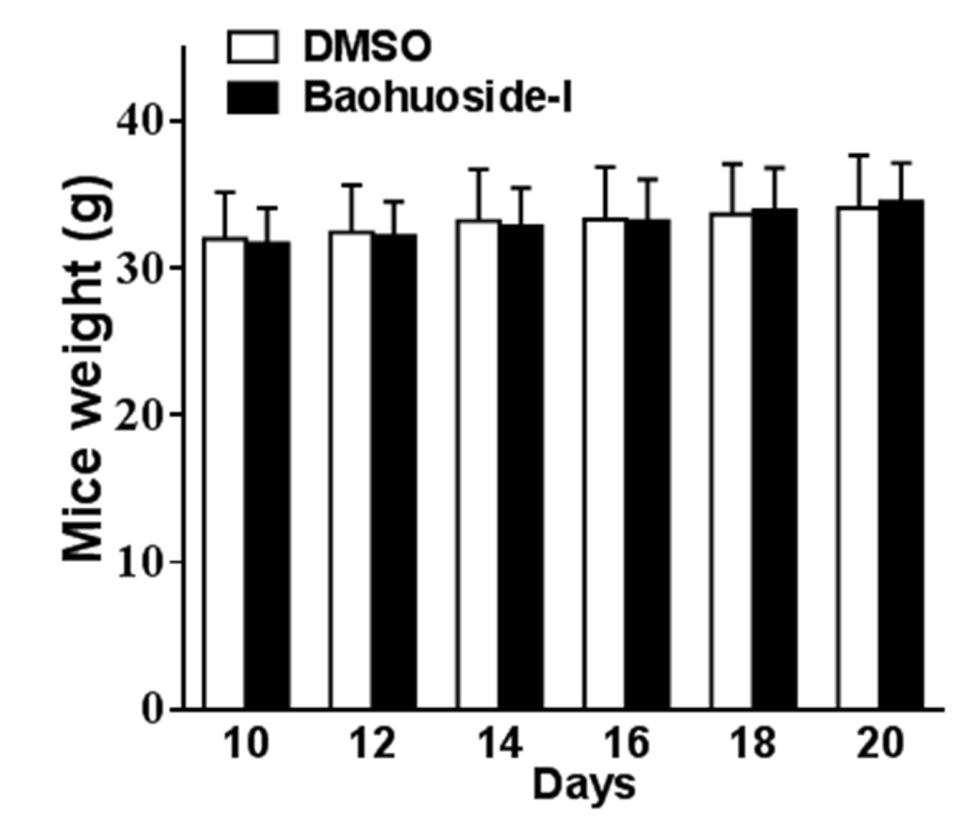
**

**Figure S2. Mice weights of tumor formation with the treatment of Baohuoside-I or DMSO.** The tumor formation assay was performed as above, and the weights of nude mice were measured every two days. Data were presented as mean+SD from eight tumors.

**
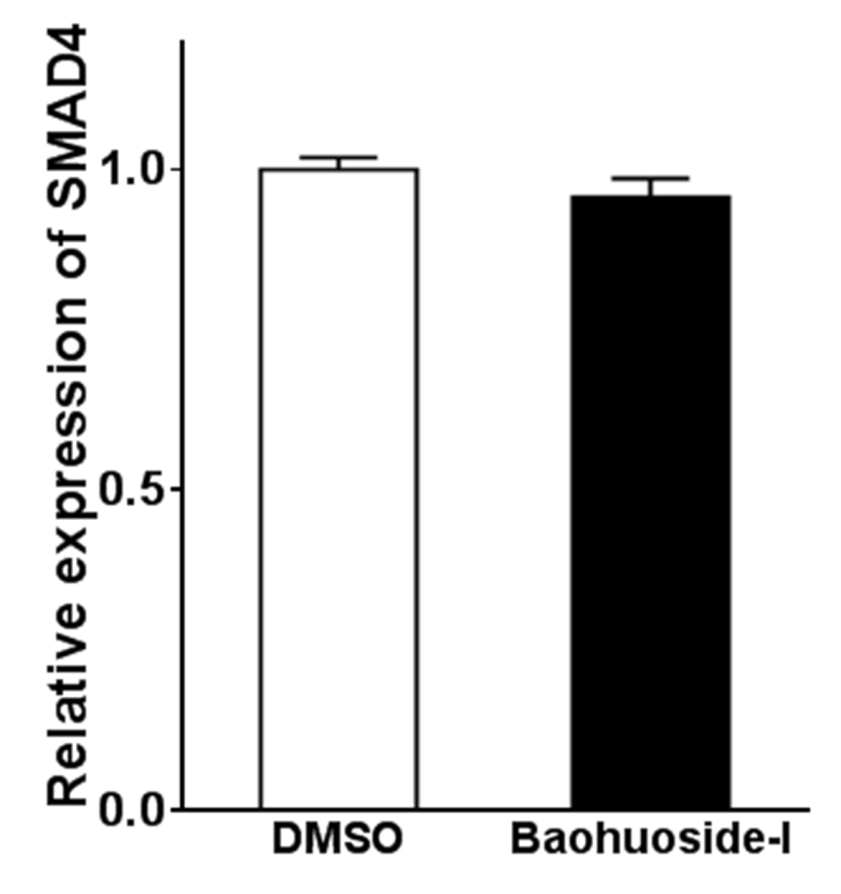
**

**Figure S3. The expression level of SMAD4 is not altered by the treatment of Baohuoside-I.** M14 was treated with 20 μg/ml Baohuoside-I or DMSO, the expression levels of SMAD4 were detected by qRT-PCR. Data were presented as mean+SD from three independent experiments with triple replicates per experiment.
